# Supplementary material for: Phylogenomic Analyses of Nuclear Genes Reveal the Evolutionary Relationships within the BEP Clade and the Evidence of Positive Selection in Poaceae
Source: PubMed Central journal article supplement (PMC3667173; doi:10.1371/journal.pone.0064642), 2013-05-29

**A**

**Trinity**

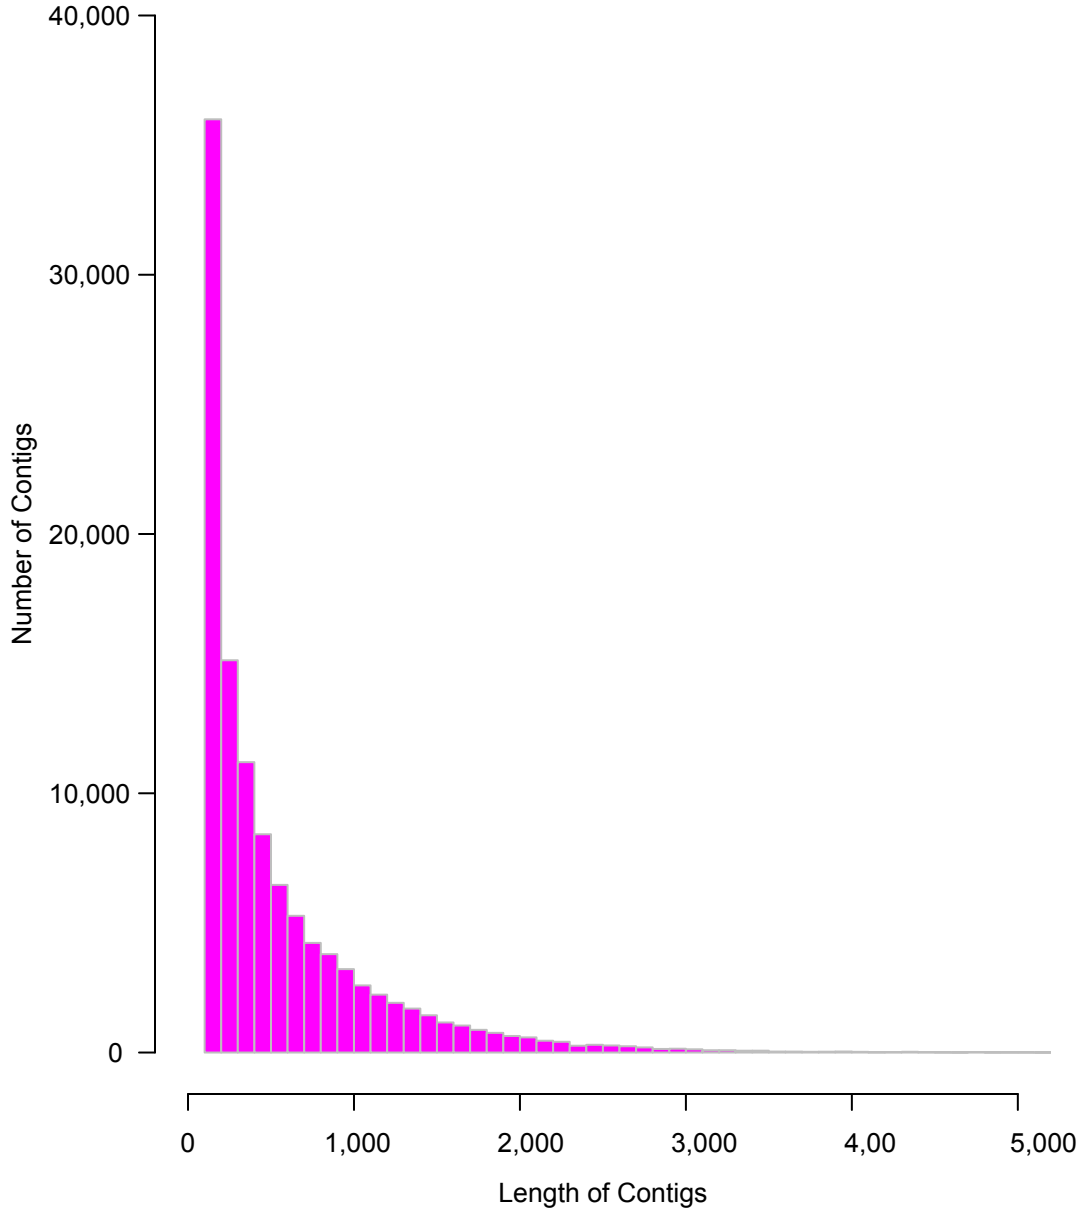

**B****TGICL**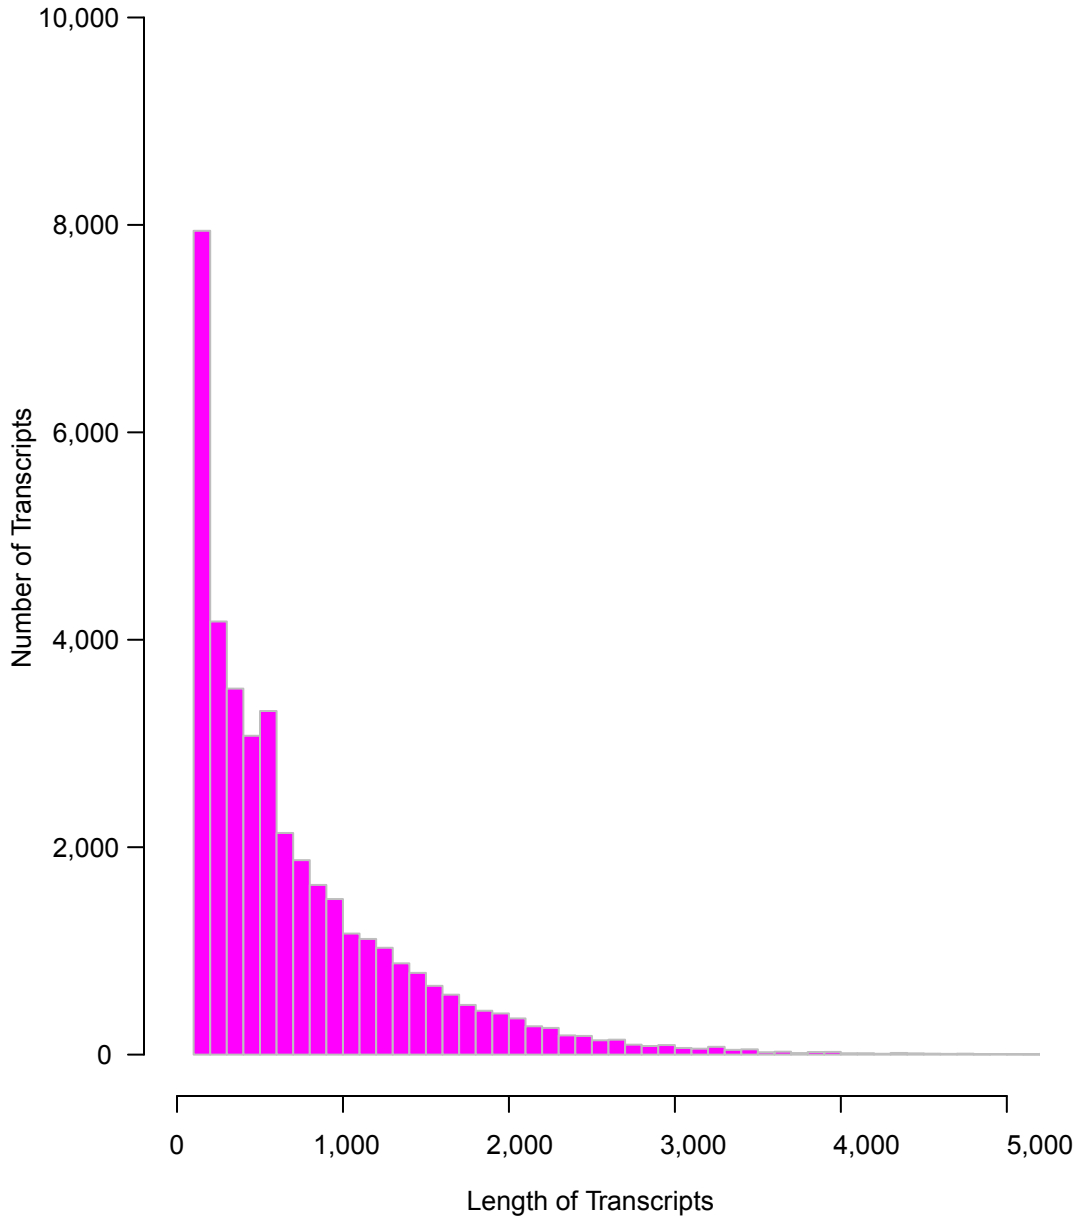

Supplement: pone.0064642.s002.pdf [file pone.0064642.s002.pdf]
