# Supplementary material for: Phylogenomic Analyses of Nuclear Genes Reveal the Evolutionary Relationships within the BEP Clade and the Evidence of Positive Selection in Poaceae
Source: PubMed Central journal article supplement (PMC3667173; doi:10.1371/journal.pone.0064642), 2013-05-29
Supplement: pone.0064642.s009.pdf [file pone.0064642.s009.pdf]

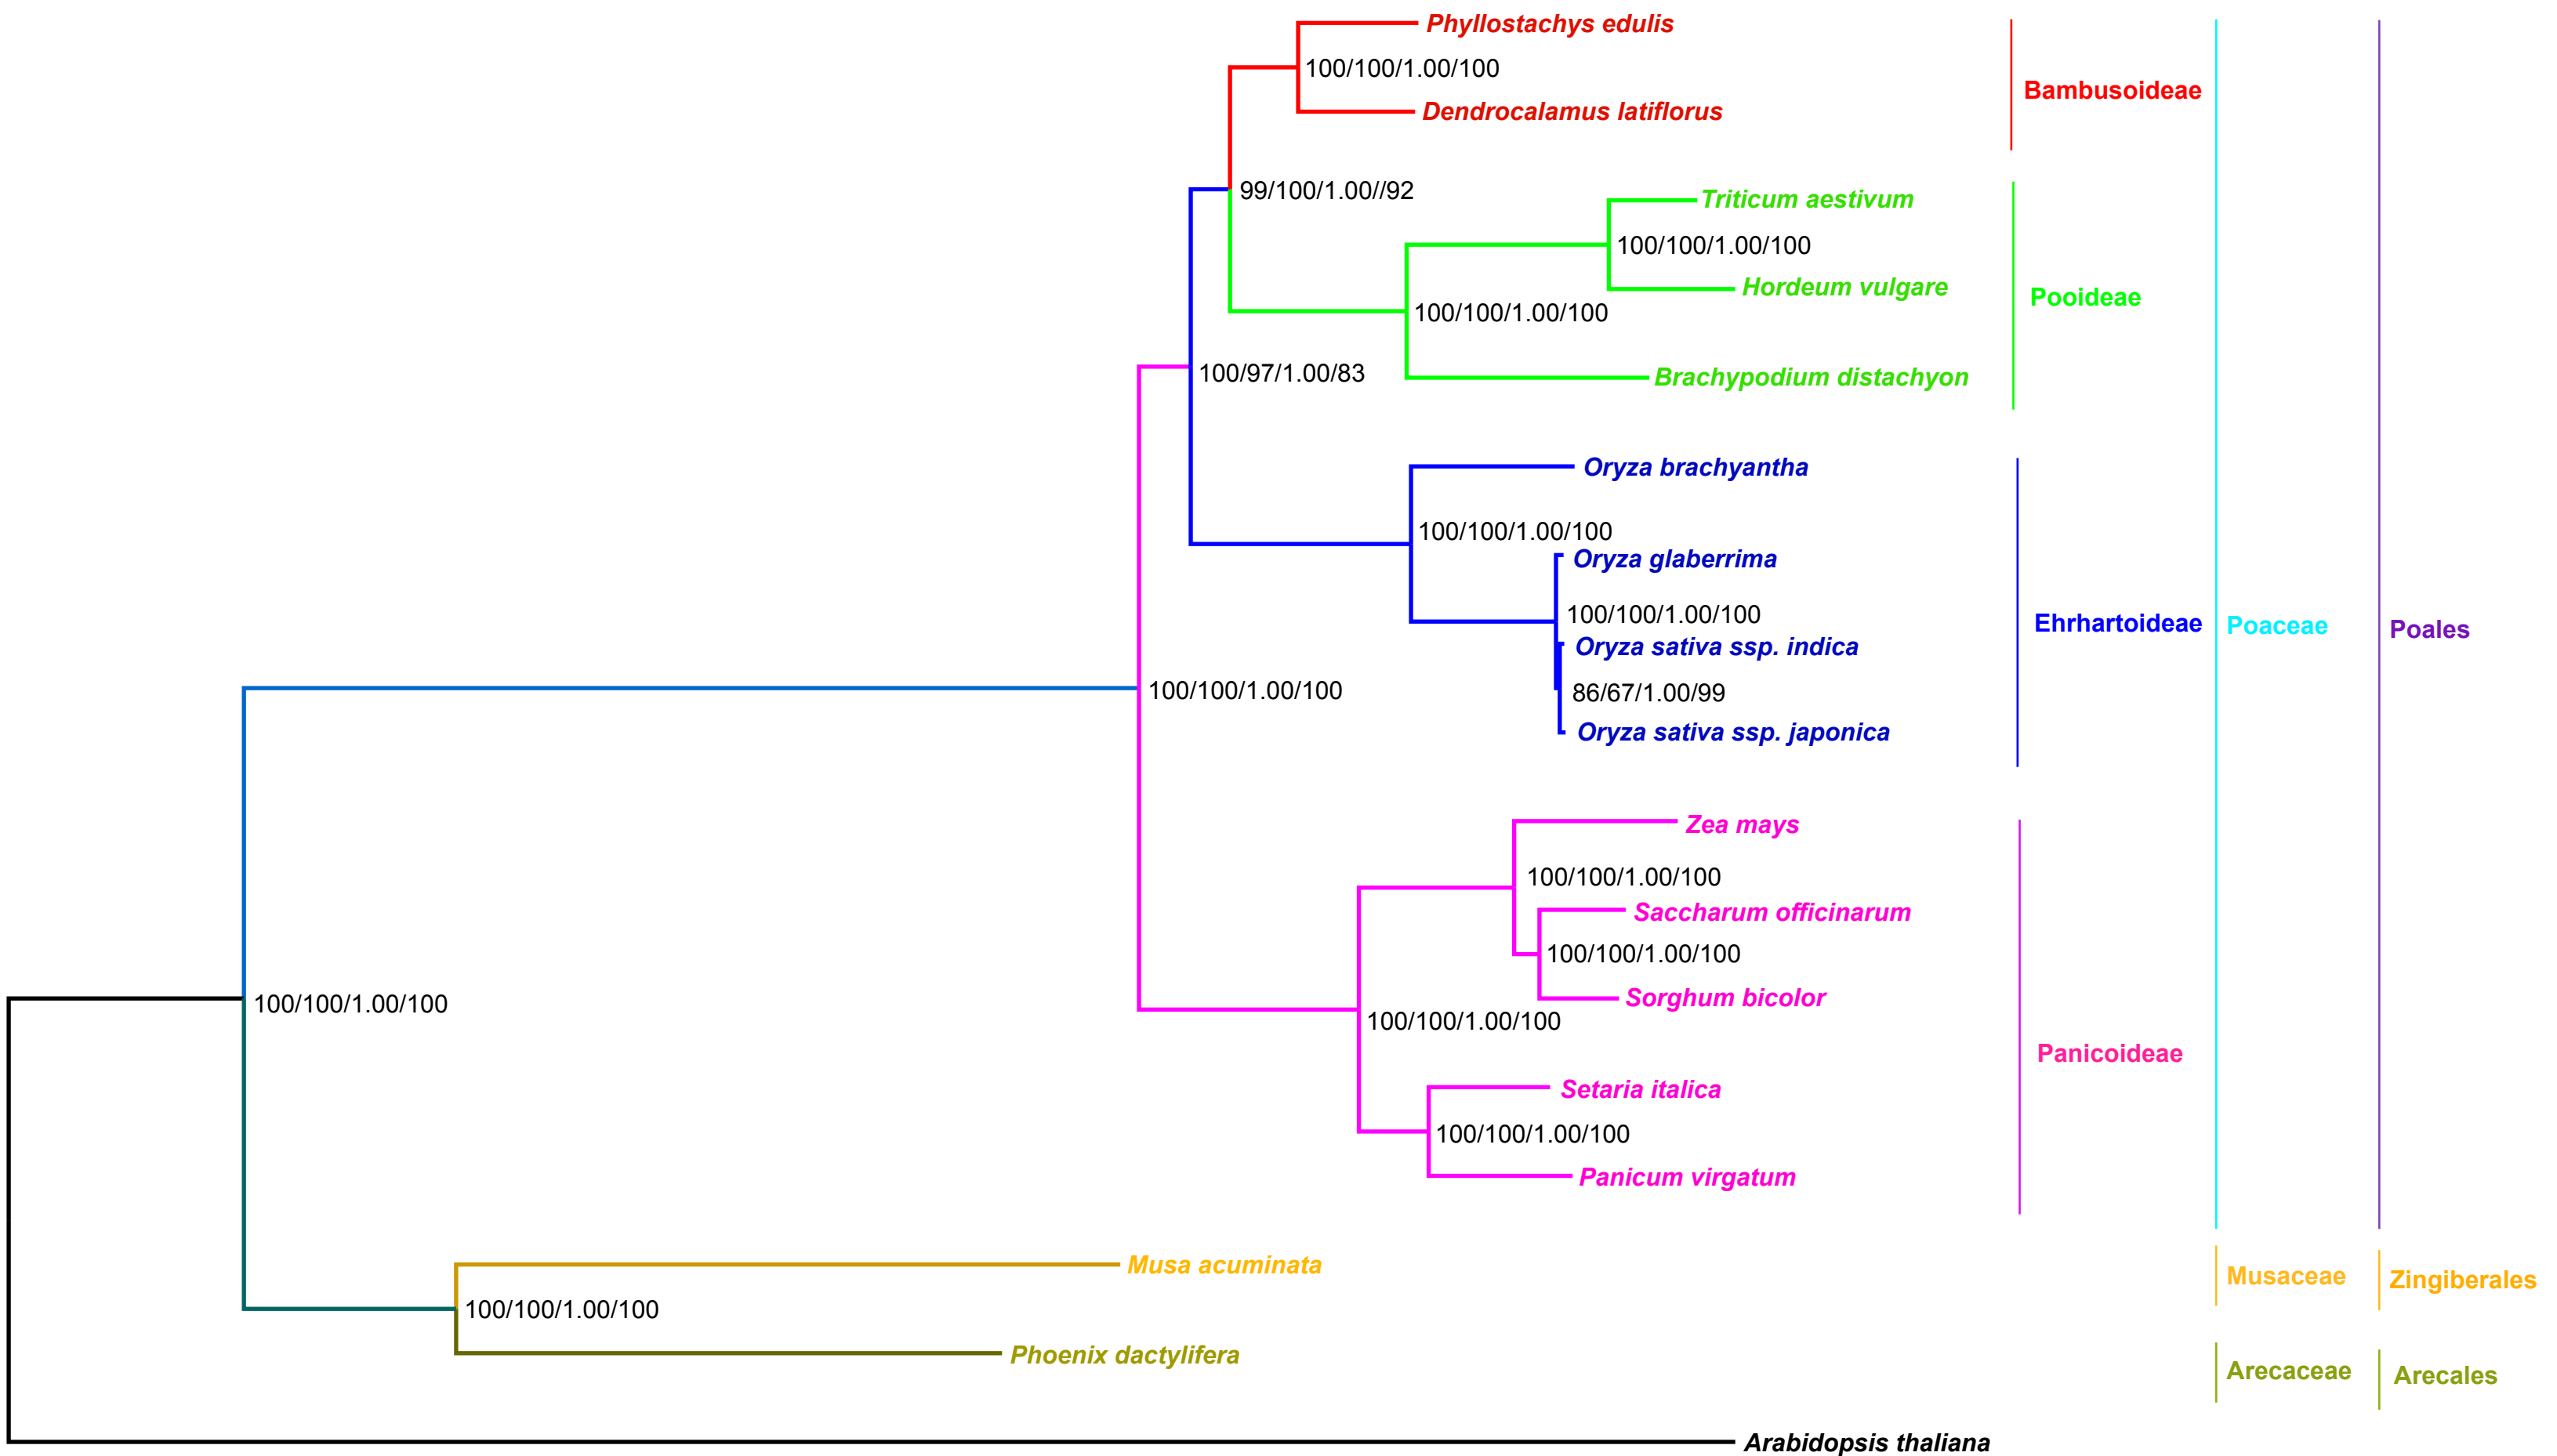

0.05
