# Supplementary material for: Phylogenomic Analyses of Nuclear Genes Reveal the Evolutionary Relationships within the BEP Clade and the Evidence of Positive Selection in Poaceae
Source: PLoS One. 2013 May 29;8(5):e64642. doi: 10.1371/journal.pone.0064642 (PMC3667173; doi:10.1371/journal.pone.0064642)
Supplement: Table S1 — Overview of the species used in this study and the corresponding data sources. (XLS) [file pone.0064642.s013.xls]

## Sheet: Table S1
Species	Type	Database
Dendrocalamus latiflorus	Illumina RNA-Seq reads	NCBI
Dendrocalamus latiflorus	EST	NCBI
Phyllostachys edulis	PUT	PlantGDB
Oryza glaberrima	Protein, cDNA	Ensembl
Oryza sativa ssp. indica	Protein, cDNA	Ensembl
Oryza sativa ssp. japonica	Protein, cDNA	Ensembl
Oryza brachyantha	Protein, cDNA	Ensembl
Brachypodium distachyon	Protein, CDS	PlantGDB
Triticum aestivum	PUT	PlantGDB
Hordeum vulgare	PUT	PlantGDB
Sorghum bicolor	Protein, CDS	PlantGDB
Setaria italica	Protein, CDS	PlantGDB
Zea mays	Protein, CDS	PlantGDB
Panicum virgatum	PUT	PlantGDB
Saccharum officinarum	PUT	PlantGDB
Phoenix dactylifera	Protein, mRNA	Datepalm-Genome
Musa acuminata	Protein, CDS	Banana-Genome
Arabidopsis thaliana	Protein, CDS	PlantGDB
Abbreviations: PlantGDB-assembled Unique Transcripts: PUT; Dendrocalamus latiflorus: dla; Phyllostachys edulis: ped; Oryza glaberrima: ogl; Oryza sativa ssp.indica: oin; Oryza sativa ssp.japonica: osa; Oryza brachyantha: obr; Brachypodium distachyon: bdi; Triticum aestivum: tae; Hordeum vulgare: hvu; Sorghum bicolor: sbi; Setaria italica: sit; Zea mays: zma; Panicum virgatum: pvi; Saccharum offic…
